# Supplementary material for: The contribution of NADPH thioredoxin reductase C (NTRC) and sulfiredoxin to 2-Cys peroxiredoxin overoxidation in Arabidopsis thaliana chloroplasts
Source: PubMed Central journal article supplement (PMC4423512; doi:10.1093/jxb/eru512), 2015-01-05
Supplement: supp_eru512_jexbot136846_file001.pdf [file supp_eru512_jexbot136846_file001.pdf]

**Table S1.** Oligonucleotides used for genotyping of the *srx* and *ntrc* mutants.

| Mutant                       | Locus        | Sequence                                                                   |
|------------------------------|--------------|----------------------------------------------------------------------------|
|                              | Lba1 (T-DNA) | 5'-TGGTTCACGTAGTGGGCCATCG-3'                                               |
| <i>srx</i><br>(SALK_015324)  | At1g31170    | 5'-ATTTGGATCCTCTAGCGGCGGTGTAGGAC-3'<br>5'-GAGACTGCAGTTCAGCGAAGATGATGCCT-3' |
| <i>ntrc</i><br>(SALK_012208) | At2g41680    | 5'-TCACCAACATGTGGCCC-3'<br>5'-TTCTTCATCTTCACACCCGA-3'                      |

**Table S2.** Oligonucleotides used for RT-qPCR analysis.

| Gene            | Locus     | Sequence                                                       |
|-----------------|-----------|----------------------------------------------------------------|
| <i>PP2AA3</i>   | At1g13320 | 5'-GGTTAGATTATTGGCTGTTGAGG-3'<br>5'-CGAGAAATTGACAATCACAGGA-3'  |
| <i>ACTIN</i>    | At3g18780 | 5'-GCACTTGCACCAAGCAGCAT-3'<br>5'-CCTTTCAGGTGGTGCAACGAC-3'      |
| <i>18S rRNA</i> | At3g41768 | 5'-TATAGGACTCCGCTGGCACC-3'<br>5'-CCCGGAACCCAAAACTTTG-3'        |
| <i>UBQ</i>      | At4g05320 | 5'-GAAGTTCAATGTTTCGTTTCATGT-3'<br>5'-GGATTATACAAGGCCCCAAAA-3'  |
| <i>CCA1</i>     | At2g46830 | 5'-AACTTCACAGCTCAGTTAACAC-3'<br>5'-AATCCTGTGTTTCTCTTCTCCTC-3'  |
| <i>NTRC</i>     | At2g41680 | 5'-TGAAGATGAAGAAAGAGTACCGAG-3'<br>5'-GGTGTCCCTCATTTATTGGCCT-3' |
| <i>SRX</i>      | At1g31170 | 5'-AGCTAGGGCTTCCAACATAACG-3'<br>5'-CTCTTCAGCGAAGATGATGCC-3'    |
